# Supplementary material for: CD86 Molecule Might Be a Novel Immune-Related Prognostic Biomarker for Patients With Bladder Cancer by Bioinformatics and Experimental Assays
Source: Front Oncol. 2021 Aug 6;11:679851. doi: 10.3389/fonc.2021.679851 (PMC8378807; doi:10.3389/fonc.2021.679851)
Supplement: Supplementary file 4 [file Table_3.xlsx]

## Sheet: KEGG-enrich hub genes
Table S3: KEGG enrichment of hub genes.
ID	Description	BgRatio	pvalue	p.adjust	qvalue	geneID	Count
hsa05323	Rheumatoid arthritis	93/7946	1.72123e-12	1.51468e-10	7.972e-11	10673/1493/3109/3113/3117/3683/3689/4050/6347/6352/942	11
hsa04640	Hematopoietic cell lineage	99/7946	9.92137e-11	4.3654e-09	2.29758e-09	1436/3109/3113/3117/3559/3575/915/917/925/929	10
hsa04659	Th17 cell differentiation	107/7946	2.16836e-10	6.1653e-09	3.2449e-09	3109/3113/3117/3559/3560/3594/50615/915/917/919	10
hsa04060	Cytokine-cytokine receptor interaction	294/7946	2.80241e-10	6.1653e-09	3.2449e-09	10563/10673/1436/3559/3560/3575/3587/3594/4050/50615/6347/6352/9235/9560	14
hsa04658	Th1 and Th2 cell differentiation	92/7946	1.27678e-09	2.24714e-08	1.18271e-08	3109/3113/3117/3559/3560/3594/915/917/919	9
hsa04514	Cell adhesion molecules (CAMs)	147/7946	5.00523e-09	7.34101e-08	3.86369e-08	1493/29851/3109/3113/3117/3683/3689/5788/925/942	10
hsa05340	Primary immunodeficiency	38/7946	4.89639e-08	6.15546e-07	3.23972e-07	29851/3575/5788/695/915/925	6
hsa04061	Viral protein interaction with cytokine and cytokine receptor	100/7946	5.78466e-08	6.36312e-07	3.34901e-07	10563/1436/3559/3560/3587/6347/6352/9560	8
hsa04660	T cell receptor signaling pathway	104/7946	7.87783e-08	7.70277e-07	4.05409e-07	1493/29851/3702/5788/915/917/919/925	8
hsa04672	Intestinal immune network for IgA production	49/7946	2.37045e-07	2.086e-06	1.09789e-06	10673/29851/3109/3113/3117/942	6
hsa05320	Autoimmune thyroid disease	53/7946	3.82809e-07	3.06247e-06	1.61183e-06	1493/3002/3109/3113/3117/942	6
hsa04650	Natural killer cell mediated cytotoxicity	131/7946	4.74049e-07	3.47636e-06	1.82966e-06	10870/2207/3002/3683/3689/7305/919/962	8
hsa05416	Viral myocarditis	60/7946	8.11095e-07	5.49049e-06	2.88973e-06	3109/3113/3117/3683/3689/942	6
hsa05330	Allograft rejection	38/7946	1.80595e-06	1.13517e-05	5.97458e-06	3002/3109/3113/3117/942	5
hsa05166	Human T-cell leukemia virus 1 infection	219/7946	2.38489e-06	1.39914e-05	7.36388e-06	3109/3113/3117/3559/3560/3683/3689/915/917	9
hsa05332	Graft-versus-host disease	41/7946	2.66333e-06	1.46483e-05	7.70963e-06	3002/3109/3113/3117/942	5
hsa04940	Type I diabetes mellitus	43/7946	3.3931e-06	1.75643e-05	9.24435e-06	3002/3109/3113/3117/942	5
hsa04612	Antigen processing and presentation	78/7946	3.86414e-06	1.88913e-05	9.94281e-06	10437/3109/3113/3117/925/972	6
hsa05152	Tuberculosis	180/7946	5.23905e-06	2.42651e-05	1.27711e-05	2207/3109/3113/3117/3587/3689/929/972	8
hsa05169	Epstein-Barr virus infection	201/7946	1.1821e-05	5.20125e-05	2.7375e-05	3109/3113/3117/3683/695/915/917/919	8
hsa05150	Staphylococcus aureus infection	96/7946	1.29505e-05	5.42686e-05	2.85624e-05	3109/3113/3117/3683/3689/719	6
hsa05310	Asthma	31/7946	2.30789e-05	9.23154e-05	4.85871e-05	2207/3109/3113/3117	4
hsa05321	Inflammatory bowel disease (IBD)	65/7946	2.66052e-05	0.000101794	5.35757e-05	3109/3113/3117/3594/50615	5
hsa05140	Leishmaniasis	77/7946	6.05868e-05	0.000222152	0.000116922	1536/3109/3113/3117/3689	5
hsa04145	Phagosome	152/7946	0.000171924	0.000605172	0.000318512	1536/3109/3113/3117/3689/929	6
hsa04064	NF-kappa B signaling pathway	102/7946	0.000230554	0.000751435	0.000395492	10673/4050/695/929/9560	5
hsa05142	Chagas disease (American trypanosomiasis)	102/7946	0.000230554	0.000751435	0.000395492	6347/6352/915/917/919	5
hsa04630	JAK-STAT signaling pathway	162/7946	0.000243319	0.000764717	0.000402483	3559/3560/3575/3587/3594/50615	6
hsa04620	Toll-like receptor signaling pathway	104/7946	0.000252479	0.000766143	0.000403233	51311/6352/929/942/9560	5
hsa04670	Leukocyte transendothelial migration	112/7946	0.000356446	0.00104557	0.000550302	1536/3683/3689/3702/4318	5
hsa05202	Transcriptional misregulation in cancer	186/7946	0.000511098	0.00145086	0.00076361	1436/3002/3560/4318/929/942	6
hsa05164	Influenza A	170/7946	0.00233697	0.00642666	0.00338245	3109/3113/3117/6347/6352	5
hsa05144	Malaria	50/7946	0.00258982	0.00690617	0.00363483	3683/3689/6347	3
hsa05145	Toxoplasmosis	112/7946	0.00329	0.0085153	0.00448174	3109/3113/3117/3587	4
hsa04062	Chemokine signaling pathway	189/7946	0.00369506	0.00929045	0.00488971	10563/3702/6347/6352/9560	5
hsa04380	Osteoclast differentiation	128/7946	0.00530059	0.012957	0.00681948	11025/1436/695/7305	4
hsa05322	Systemic lupus erythematosus	133/7946	0.00606722	0.0144301	0.00759481	3109/3113/3117/942	4
hsa05162	Measles	138/7946	0.0069047	0.0159898	0.0084157	3559/3560/915/917	4
